# Supplementary material for: Sustained activation of the Aryl hydrocarbon Receptor transcription factor promotes resistance to BRAF-inhibitors in melanoma
Source: PubMed Central journal article supplement (PMC6235830; doi:10.1038/s41467-018-06951-2), 2018-11-14
Supplement: 41467_2018_6951_MOESM1_ESM.pdf [file 41467_2018_6951_MOESM1_ESM.pdf]

# Supplementary Figure 1

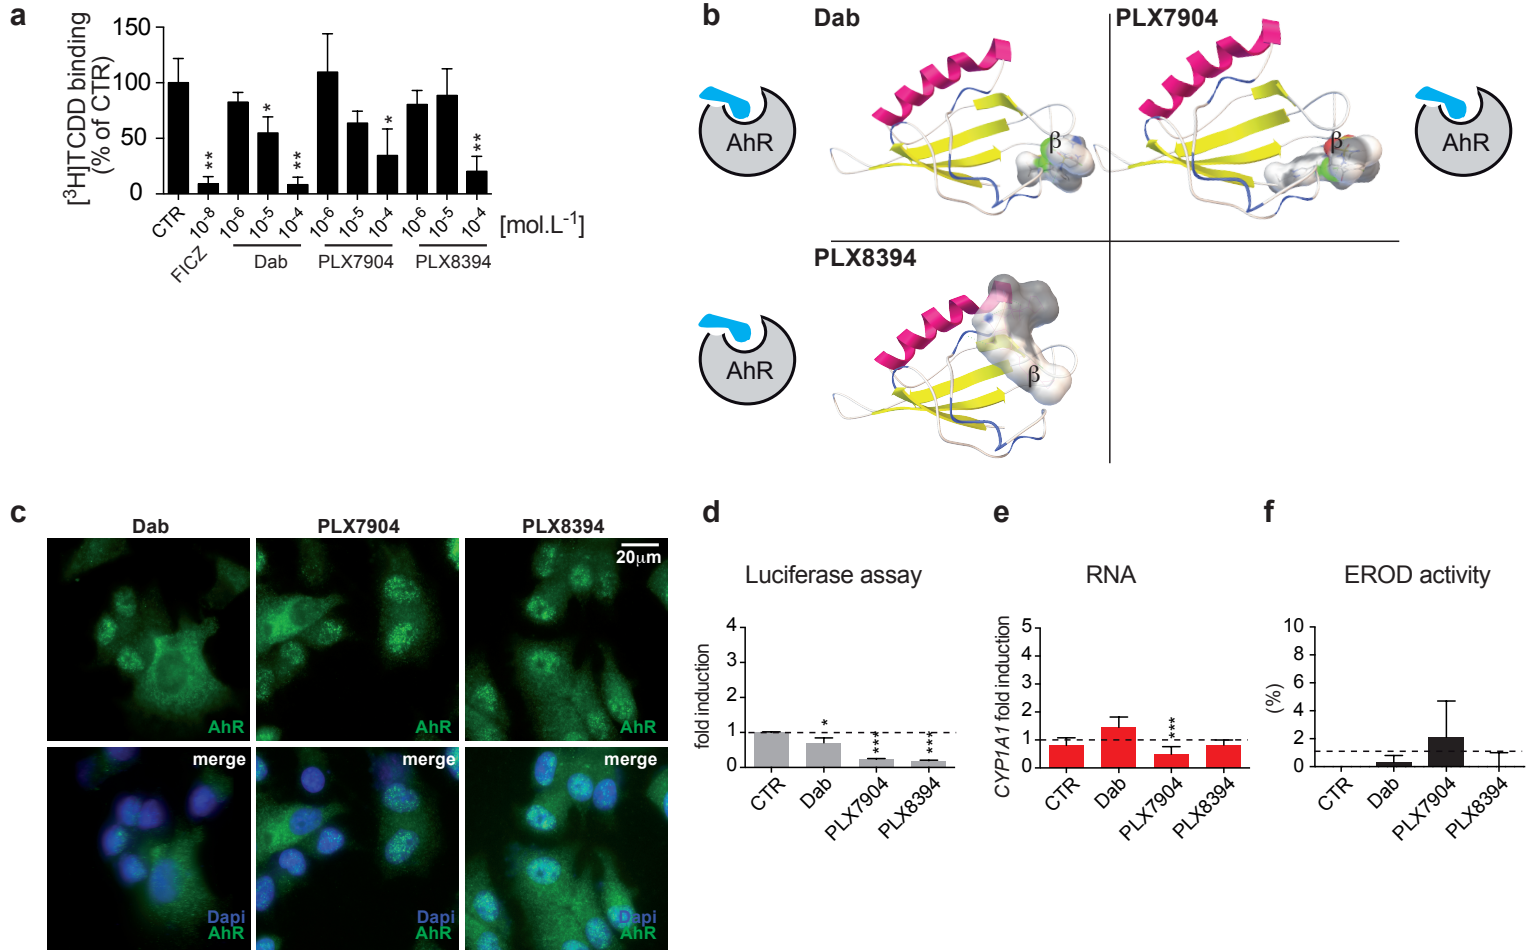

**Supplementary Figure 1: BRAF-V600E inhibitors bind to AhR and antagonizes canonical AhR pathway.**

**a**, Competitive binding of FICZ, dabrafenib (Dab), PLX7904 or PLX8394 to AhR. Hepatic cytosol containing AhR was incubated with [<sup>3</sup>H]TCDD in the presence of DMSO (1%), or FICZ or increasing concentrations of BRAFi ( $10^{-6}$  to  $10^{-4}$  mol/L<sup>-1</sup>).

**b**, Proposed binding mode of Dab, PLX7904 and PLX8394 into the homology model of PAS-B of AhR. Free binding energy is reported in Table 1.

**c**, AhR nuclear translocation in response to Dab (100 nM), PLX7904 (1  $\mu$ M) or PLX8394 (1  $\mu$ M) in MCF7 cells 1 h after treatment. AhR in green (IHC) and nucleus staining in blue.

**d-f**, BRAFi do not activate canonical AhR transcriptional activity. **d**, Evaluation of AhR transcriptional activity related to AhR/ARNT binding sites (XRE) using p3XRE-luciferase constructs. MCF7 cells were exposed to Dab (100 nM), PLX7904 (1  $\mu$ M) or PLX8394 (1  $\mu$ M) or vehicle (DMSO) for 6 h.

**e**, BRAFi do not induce *CYP1A1* mRNA. MCF7 cells were either untreated or treated with Dab (100 nM), PLX7904 (1  $\mu$ M) or PLX8394 (1  $\mu$ M) for 15 h.

**f**, BRAFi do not induce EROD activity. EROD enzymatic activity is associated with members of the cytochrome P450 1 family. MCF7 cells were either untreated or treated with Dab (100 nM), PLX7904 (10  $\mu$ M) or PLX8394 (10  $\mu$ M) or vehicle (DMSO) for 6 h.

For the different experiments, data are expressed in arbitrary units, comparatively with the value found in DMSO-treated cells, arbitrarily set to 1 and correspond to the means  $\pm$  s.d. of three independent experiments. Statistical analysis was performed using unpaired t-test (PRISM6.0<sup>®</sup>)  
\*,  $p < 0.05$ ; \*\*,  $p < 0.01$ ; \*\*\*,  $p < 0.001$ .

# Supplementary Figure 2

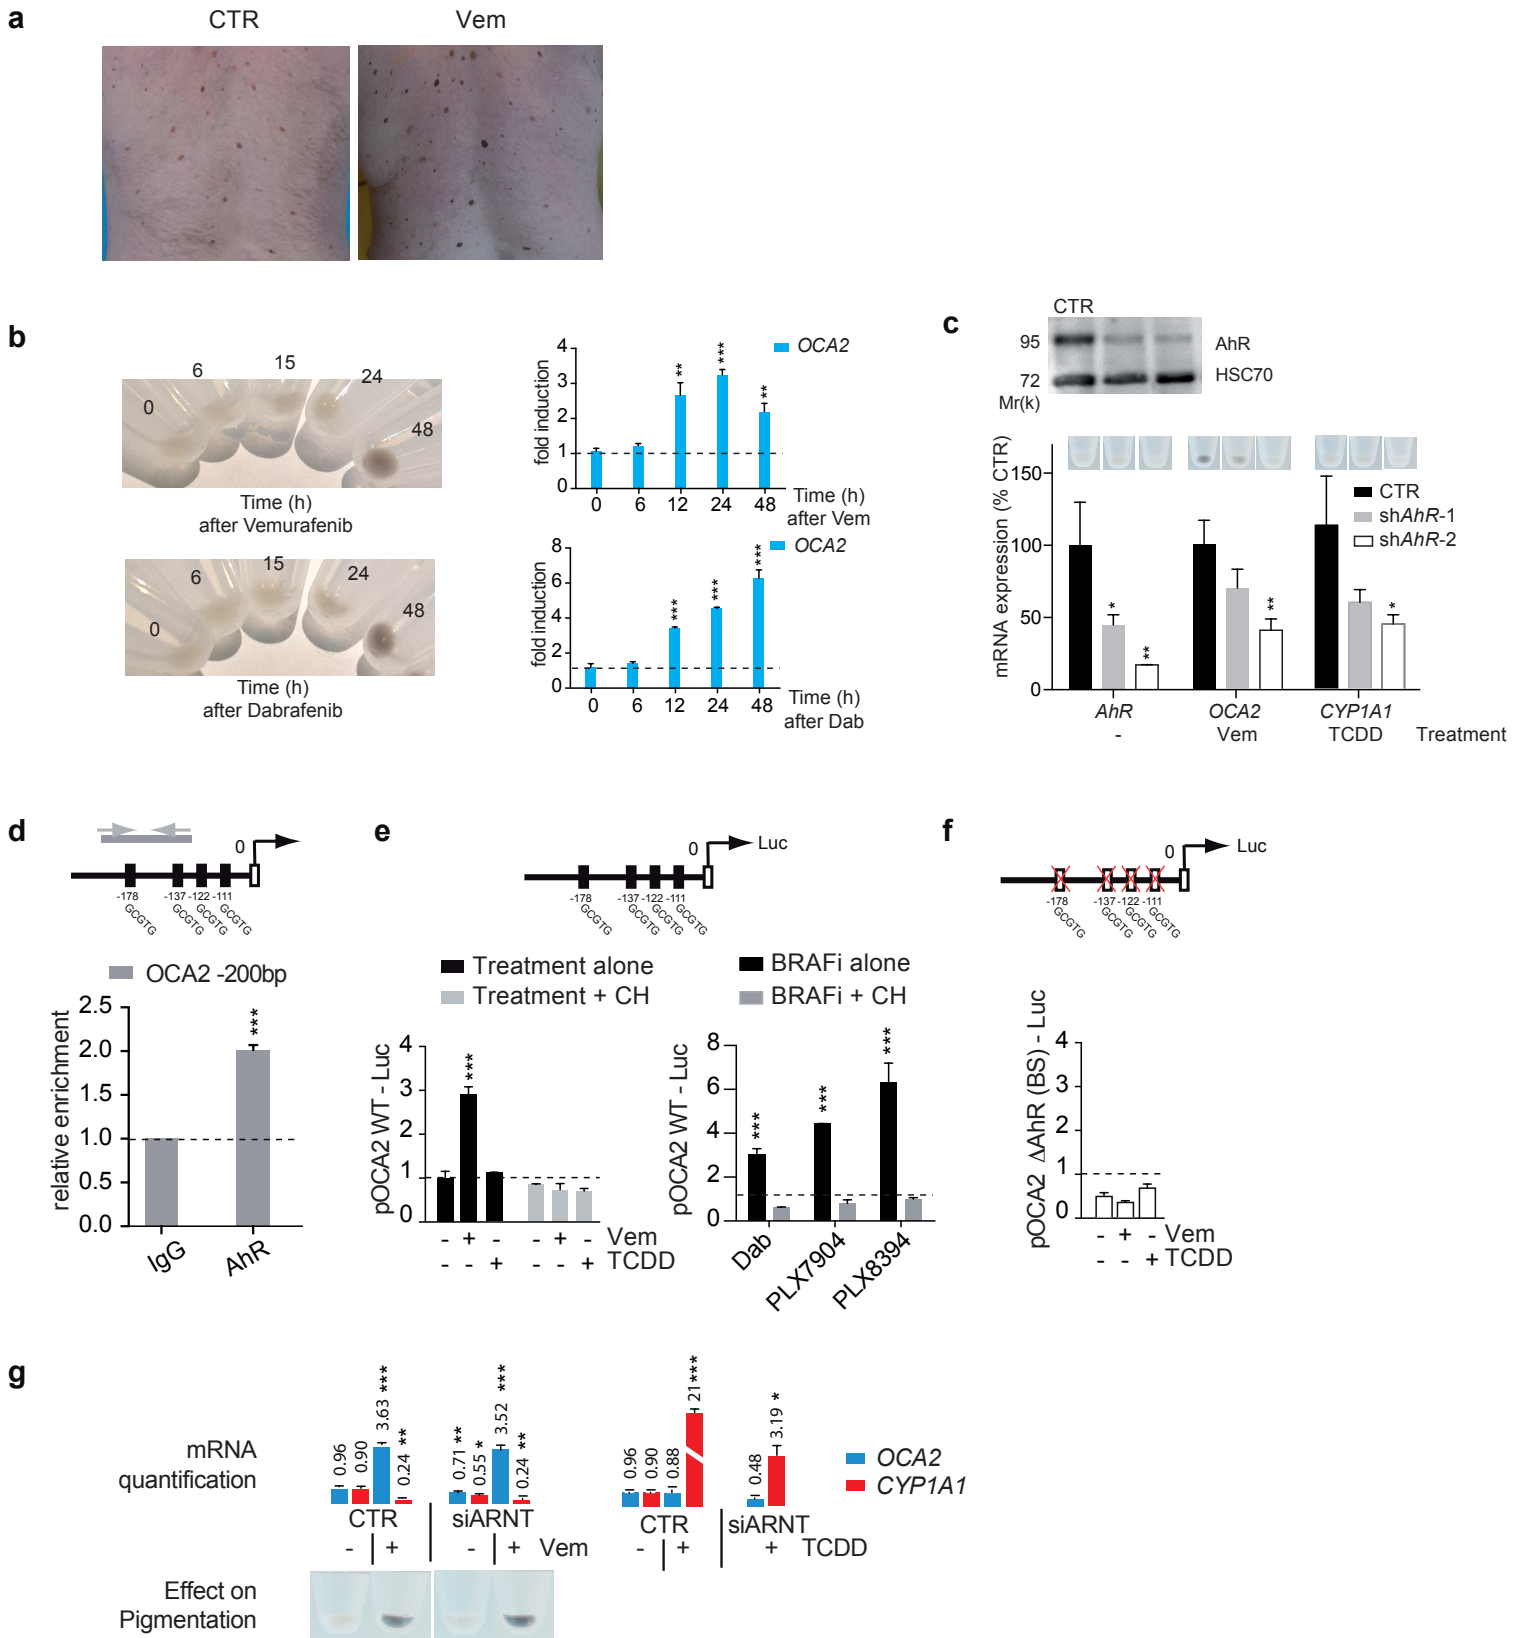

**Supplementary Figure 2: AhR-OCA2 axis is associated to pigmentation.**

**a**, Vem induces pigmentation *in vivo* Picture of nevi from patient treated with Vem.

**b**, Kinetic of 501Mel cells pigmentation and *OCA2* mRNA induction in response to Vemurafenib (1  $\mu$ M) or Dabrafenib (100 nM) exposure (in hour).

**c**, *AhR* knock down reduces *OCA2* mRNA and *CYP1A1* mRNA expression levels in 501Mel melanoma knock-downed for AhR by two shRNA in response respectively to Vem (1  $\mu$ M) and TCDD (10 nM) (48 h).

**d-f**, Vem-activated AhR induces pigmentation by transactivating *OCA2* promoter *via* AhR binding sites. **e**, For ChiP experiment, histograms represent the mean  $\pm$  s.d. relative occupancy of AhR onto *OCA2* promoter referred to non-specific IgG antibody for three independent experiments in 501Mel cell line. Promoter activity has been evaluated using pOCA2-Luc wild-type (**e**) or mutated AhR Binding sites constructs ( $\Delta$ AhR BS) (**f**) after Vem (1  $\mu$ M) or TCDD (10 nM), or vehicle (DMSO) for 6 h in the presence or absence of the specific AhR antagonist CH-223191 (10  $\mu$ M).

**g**, Pigmentation and *OCA2* induction in response to Vem depend of AhR expression level but not to ARNT. Data are representative of knock-down 501Mel cells for ARNT using siRNA targeting ARNT. Control or depleted 501Mel cells for ARNT were treated (+) with Vem (1  $\mu$ M) or TCDD (10 nM) or vehicle (-). *OCA2* and *CYP1A1* mRNA levels have been analysed using RT-qPCR. Data are expressed in arbitrary units, comparatively with the value of expression level found in vehicle-treated cells (CTR). Western blot or RT-qPCR analyses have been performed to confirm AhR depletion in cells for ARNT (data not shown).

For the different experiments, data are expressed in arbitrary units, comparatively with the value found in DMSO-treated cells (CTR), arbitrarily set to 1 and correspond to the means  $\pm$  s.d. of three independent experiments. Statistical analysis was performed using unpaired t-test (PRISM6.0<sup>®</sup>) \*,  $p < 0.05$ ; \*\*,  $p < 0.01$ ; \*\*\*,  $p < 0.001$ .

# Supplementary Figure 3

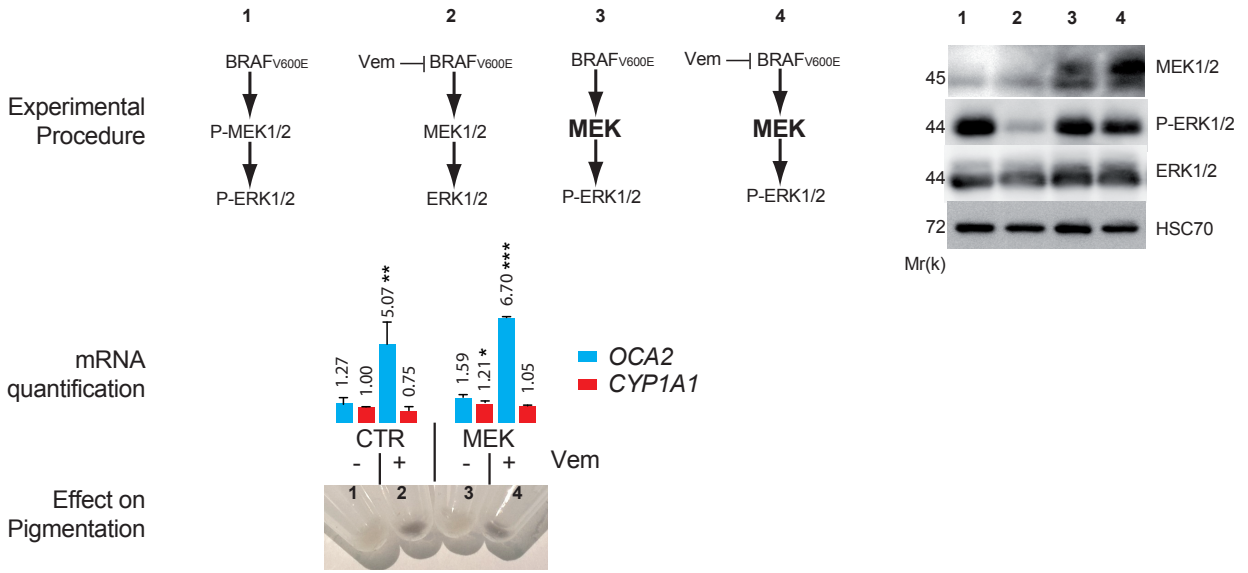

**Supplementary Figure 3: AhR reprogramming by Vem is ERK-independent.**

501Mel cells were or not transfected with dominant form of MEK kinase to prevent the effect of Vemurafenib on inhibition of MEK/ERK pathway. 24 h after transfection, 501Mel cells were untreated or treated with 1  $\mu$ M Vemurafenib (Vem) for 48 h. *OCA2* and *CYP1A1* mRNA levels were analyzed using RT-qPCR (middle). Activation or inhibition of MEK/ERK pathway was confirmed by Western blot analysis of MEK1/2, P-ERK1/2, ERK1/2, and HSC70 (as loading control) in protein extracts from treated 501Mel cells.

# Supplementary Figure 4

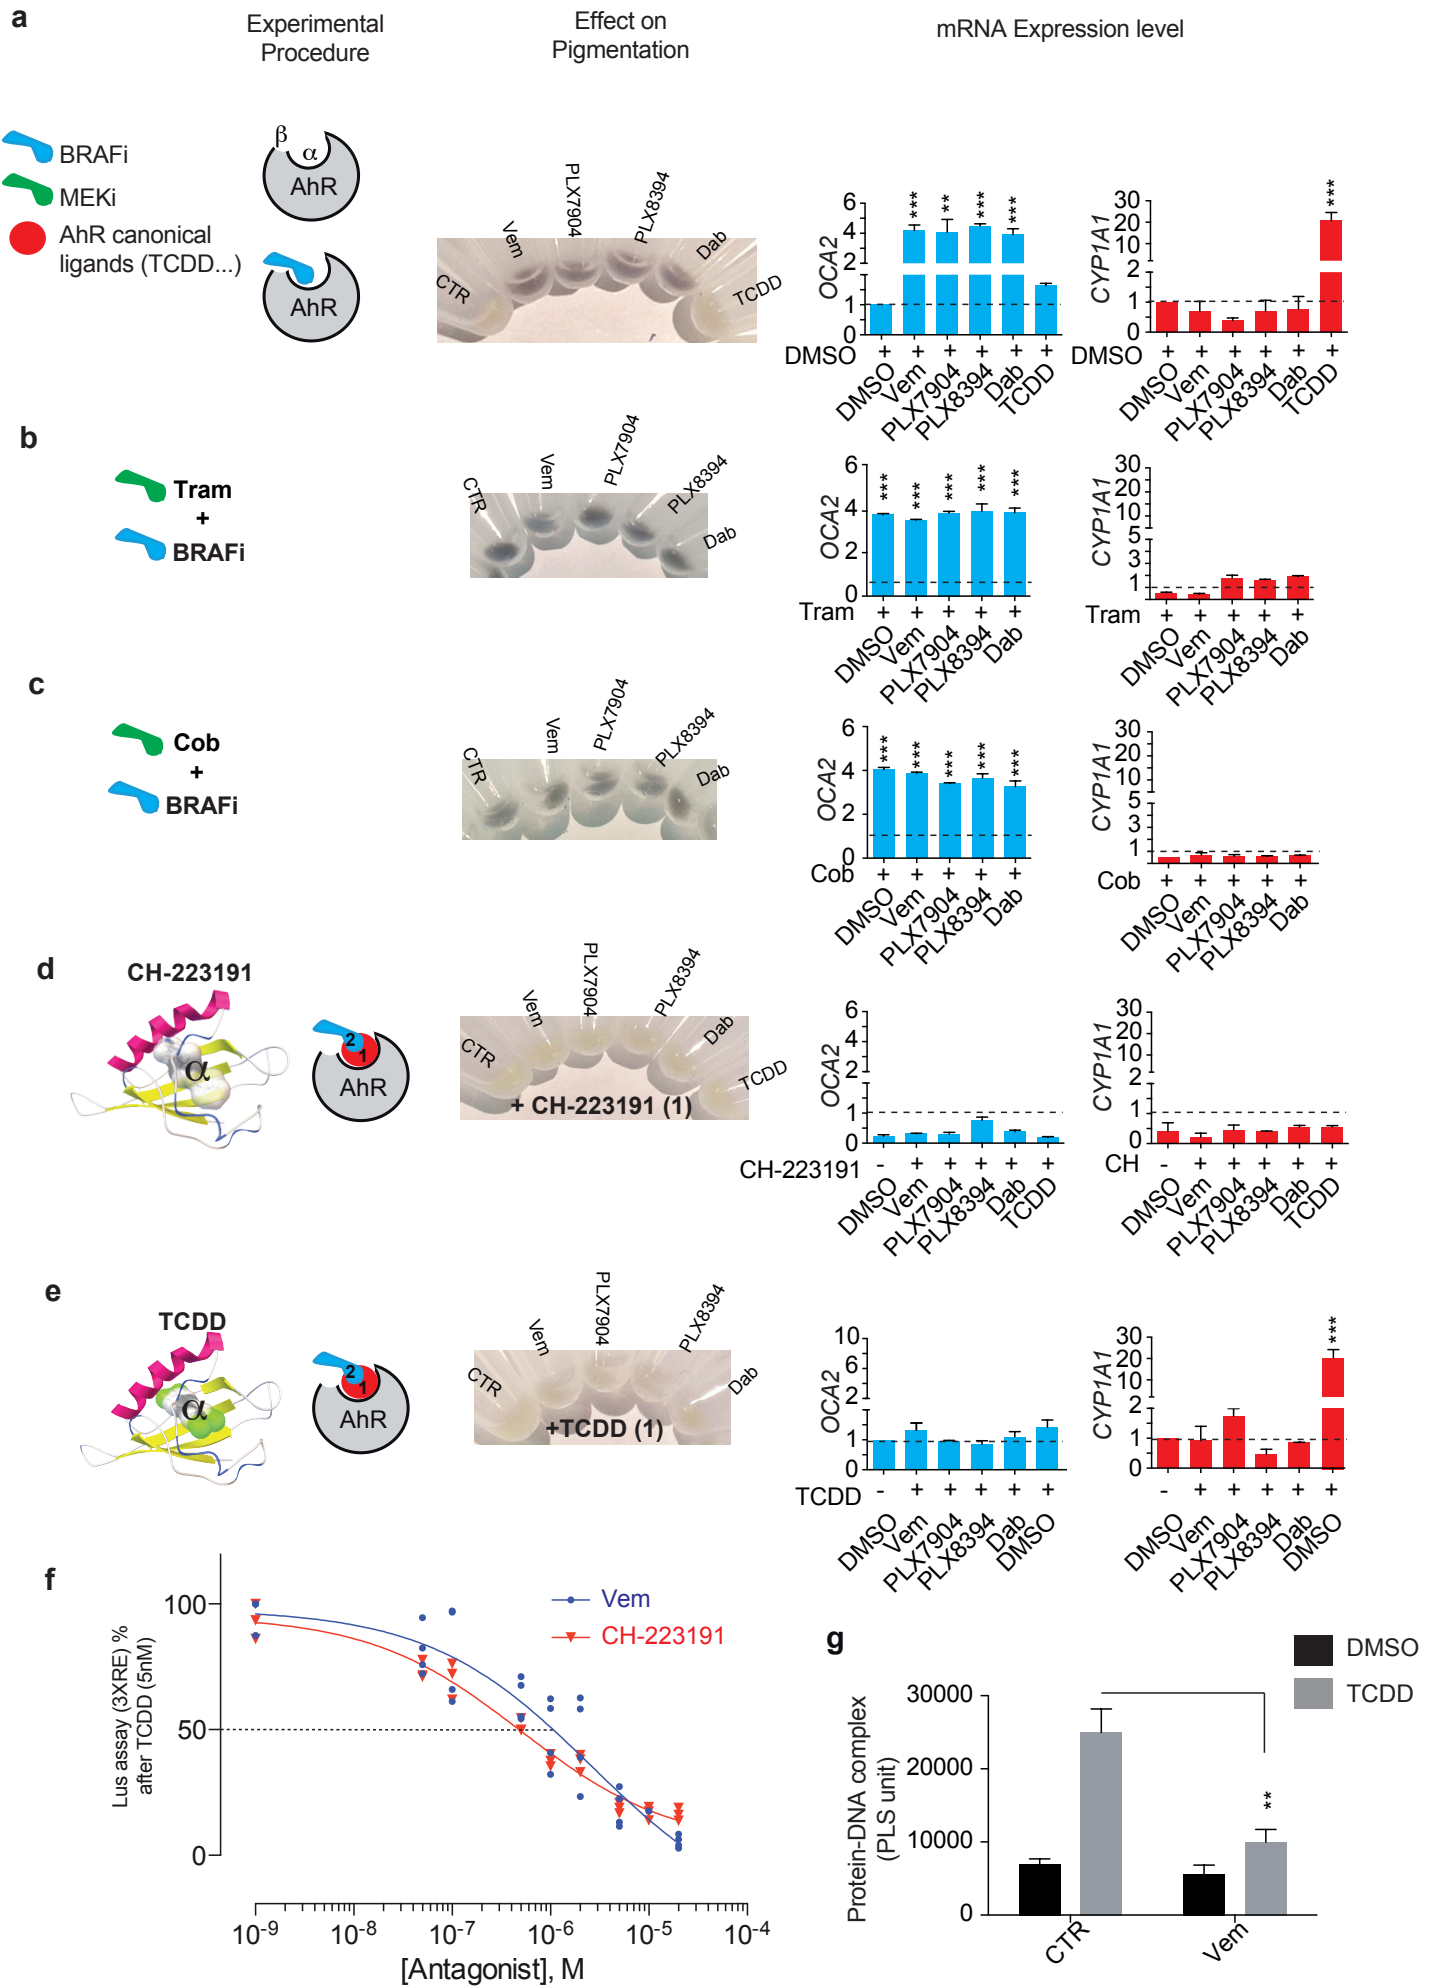

**Supplementary Figure 4: AhR reprogramming by BRAFi is druggable by targeting the  $\alpha$ -pocket of AhR.**

Pigmentation and *OCA2* inductions in cells exposed for 48 h to BRAFi Vemurafenib (Vem) (1  $\mu$ M), PLX7904 (1  $\mu$ M), PLX8394 (1  $\mu$ M), Dabrafenib (Dab) (100 nM) alone **(a)** or in competition with MEK inhibitors Trametinib (1  $\mu$ M) **(b)**, Cobimetinib (1  $\mu$ M) **(c)**, AhR ligands CH-223191 (10  $\mu$ M) **(d)** or TCDD (10 nM) **(e)**. BRAFi and/or MEKi alone induced *OCA2* expression and pigmentation in contrast to combination with CH-223191 or TCDD. *CYP1A1* was only induced by TCDD, a potent AhR agonist ( $\alpha$ -pocket). Pretreatment (2 h) with AhR antagonist CH-223191 ( $\alpha$ -pocket) prevented both BRAFi and TCDD effects **(d)**. Similar results have been obtained when 501Mel cells have been pre-treated with TCDD instead of AhR antagonist **(e)**. It is important to note that *CYP1A1* was not induced in this condition by TCDD (TCDD followed by BRAFi exposure). Vem could be considered as AhR antagonist considering competition assay with TCDD using p3XRE-luciferase assays.

**(f)** 501Mel cells have been transfected with p3XRE-luciferase construct and induced simultaneously with TCDD (5 nM) and increasing doses of Vem or CH-223191 to compete with AhR agonist.

**(g)** Vem prevents AhR binding on XRE motifs onto DNA induced by TCDD. *In vitro* synthesized wild-type mAhR and ARNT were incubated in the presence of solvent control (DMSO, 1%, vol/vol) or TCDD (20 nM) in the presence or not of Vemurafenib (1  $\mu$ M) for 2 to 2.5h and analysed by gel retardation assay. Gels were visualized and specific band were quantified (n=3).

For the different experiments, data are expressed in arbitrary units, comparatively with the value found in DMSO-treated cells (CTR), arbitrarily set to 1 and correspond to the means  $\pm$  s.d. of three independent experiments. Statistical analysis was performed using unpaired t-test (PRISM6.0<sup>®</sup>) \*, p<0.05; \*\*, p<0.01; \*\*\*, p<0.001.



# Supplementary Figure 5

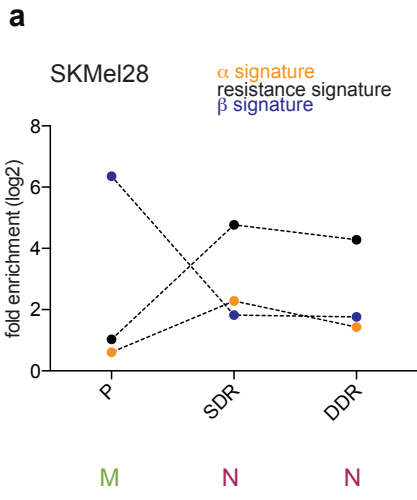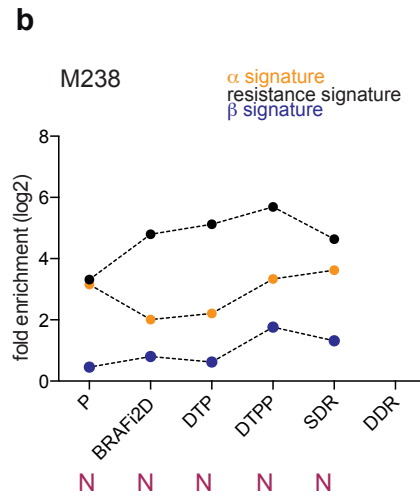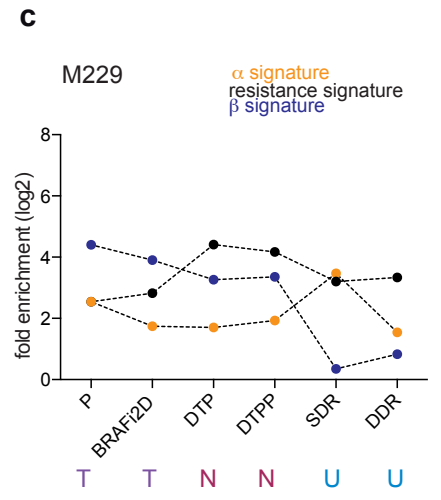

**Supplementary Figure 5: AhR-signature correlates with resistance acquiring during after long-term treatment with single-drug (i.e. BRAFi) or double-drug (i.e. BRAFi+MEKi)**

**a-c**, Fold expression level (log<sub>2</sub>) for average  $\beta$ -,  $\alpha$ -, resistance and differentiated state signatures in parental (P) cell lines (SKMel28, M234 and M229) treated with DMSO/vehicle, temporal sub-populations (2 d, DTP, DTPP) (days to weeks on BRAFi : PLX4032), and long-term sub-lines (months to years on BRAFi or BRAFi+MEKi : PLX4032+Selumetinib) resulting in single-drug resistant (SDR) or double-drug resistant (DDR) lines. (GEO, GSE75299<sup>1</sup>). To derive DTPP clones, parental melanoma cells seeded at low density were treated with drugs as described<sup>1</sup> every 2-3 days for 3-6 weeks, SDR and DDR sub-lines were derived as described<sup>2-4</sup>.

# Supplementary Figure 6

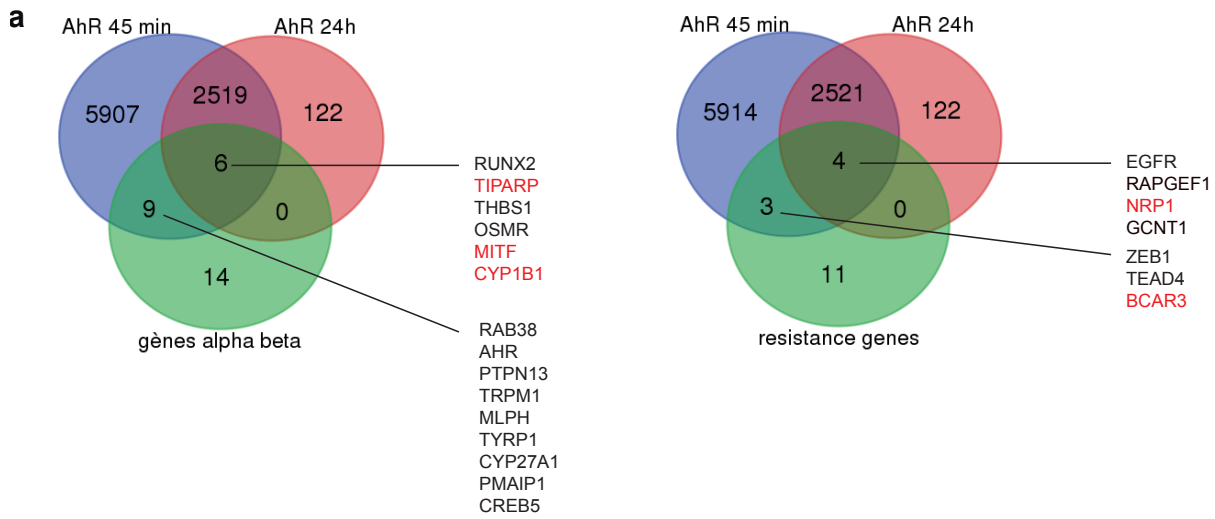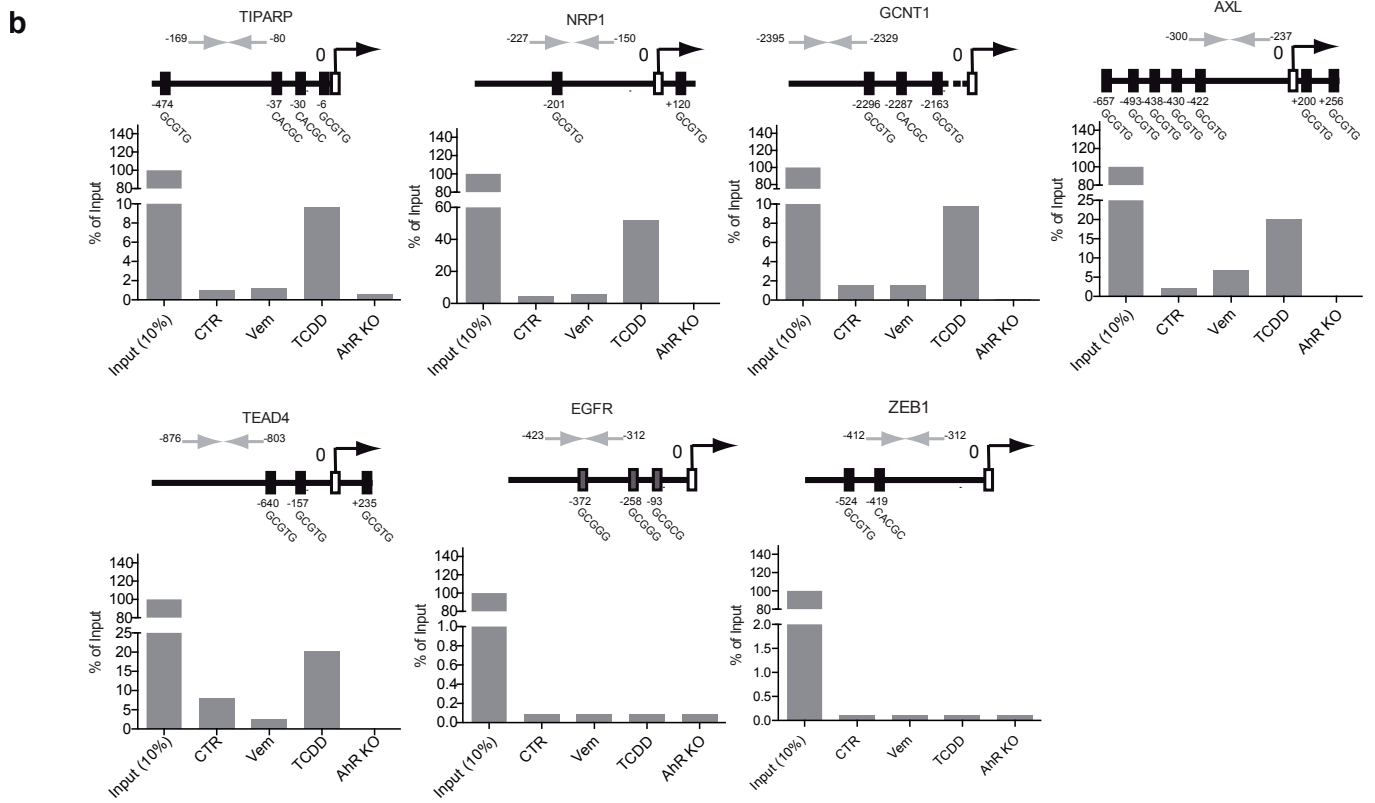

**Supplementary Figure 6: AhR binds to resistance genes promoter in response to  $\alpha$ -ligand**

**a**, Venn diagram representing the overlapping between  $\alpha$ - and  $\beta$ - or resistance genes with dataset for ChIPseq experiments performed by Mathews'lab for AhR transcription factor 45 min to 24h after induction by TCDD (10 nM) of MCF7 cells (GSE90550<sup>5</sup>).

**b**, ChiP experiment has been performed using specific AhR antibody in 501Mel cells and in knocked-down cells (as negative control) treated for 1h with TCDD (10nM) or 6h with Vem (1  $\mu$ M) (n=1). Values represent the percentage of enrichment of the transcription factor onto proximal promoter of target genes, containing XRE motifs, compared to Input.

# Supplementary Figure 7

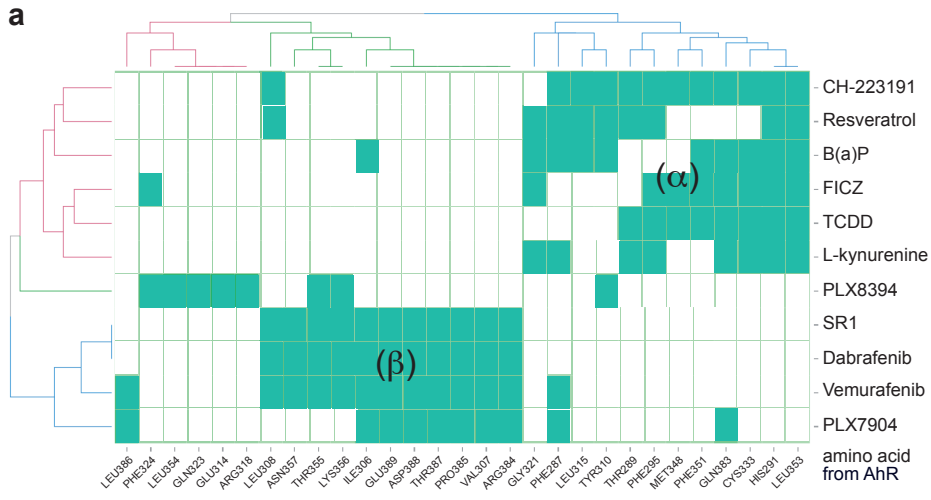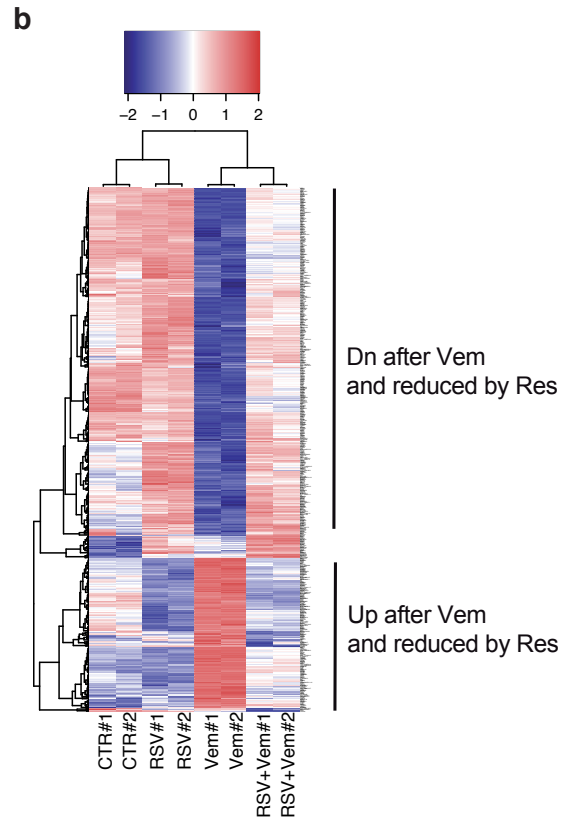

**Supplementary Figure 7: The AhR antagonist Resveratrol blocks Vem induced AhR reprogramming ( $\beta$ -signature).**

**a**, Heat map representing hierarchical clustering of AhR ligands and their putative interactions with amino-acids of PAS B domain of AhR. BRAFi clustered together.

**b**, Gene expression profile of the 501Mel cells exposed to vehicle, Vem (1  $\mu$ M), RSV (5  $\mu$ M) or RSV (5  $\mu$ M) + Vem (1  $\mu$ M) (n=2) for 48 h. Heatmap focused on differentially expressed genes in function of treatment.

## Supplementary Figure 8

**a**

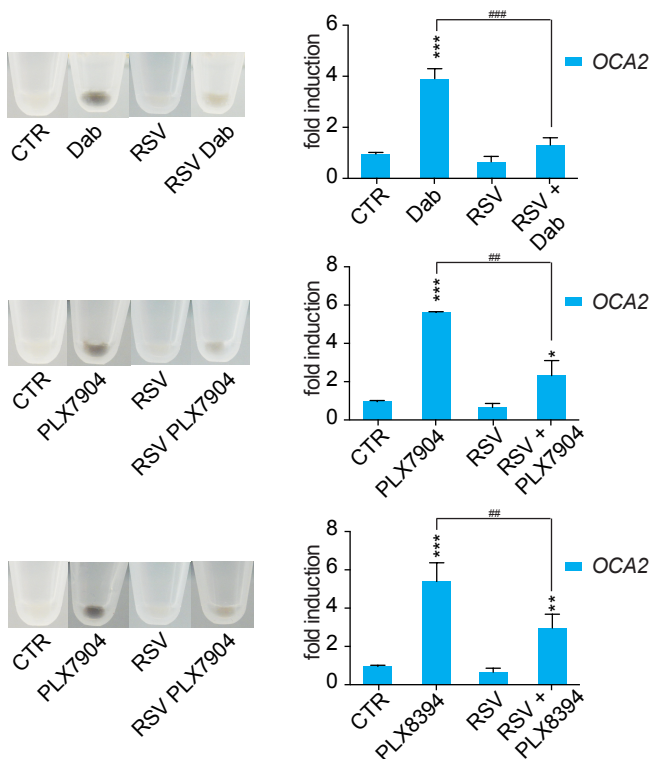

**b**

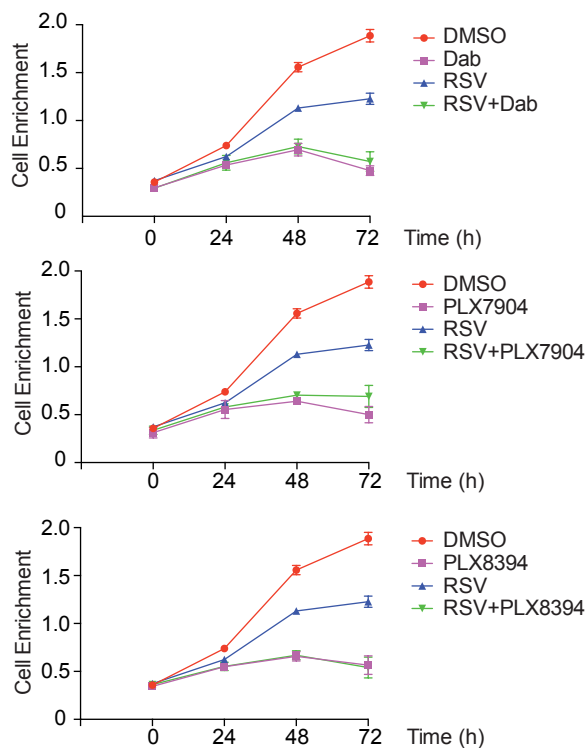

**c**

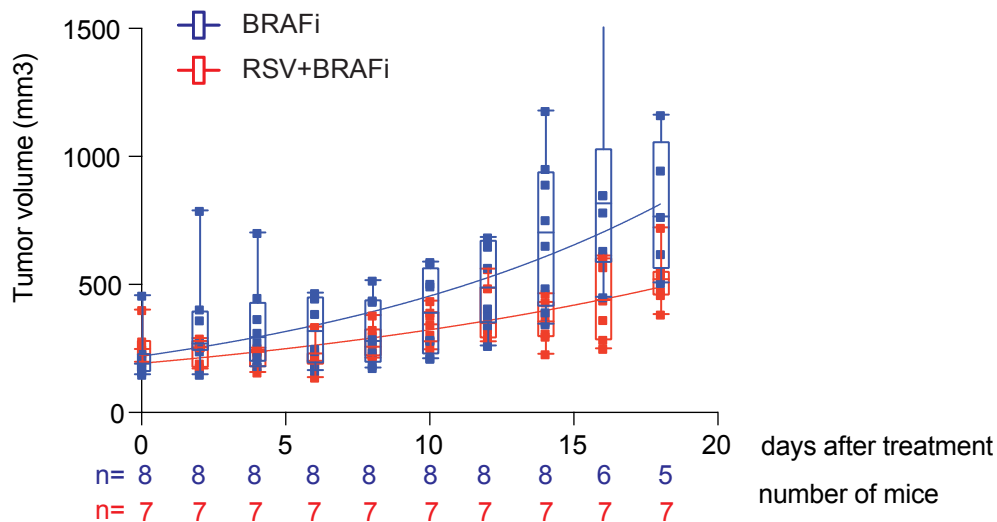

**Supplementary Figure 8: Resveratrol prevents AhR reprogramming and maintains antiproliferative effects of BRAFi.**

**a**, Pigmentation analyses and *OCA2* mRNA expression levels (n=3) in 501Mel cells exposed 48 h to BRAFi Dabrafenib (Dab) (100 nM), PLX7904 (1  $\mu$ M), PLX8394 (1  $\mu$ M) alone or pretreated for 2 h with RSV (5  $\mu$ M).

**b**, RSV preserved antiproliferative effect of BRAFi in 501Mel cells. After different days after treatment, 501Mel cell density was evaluated by methylene blue staining followed by quantification at 620 nm (n=2).

**c**, PDX tumor volumes for individual mice after daily treatment with Dabrafenib (30 mg/Kg) (n=8) or in combination with RSV (40 mg/Kg) (n=7).



## Supplementary Tables

**Supplementary Table 1** : Binding Energy of different ligands for PAS-B domain of AhR and AA close contact evaluated by docking experiments.

| Chemicals |                                                                                     | Binding Energy | H-Bond           | Pi-Cation interaction | Close Contact                                                                                                                                      |
|-----------|-------------------------------------------------------------------------------------|----------------|------------------|-----------------------|----------------------------------------------------------------------------------------------------------------------------------------------------|
| TCDD      | 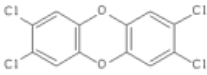   | -7.68          |                  |                       | THR289<br>HIS291<br>PHE295<br>CYS333<br>HIS337<br>MET348<br>PHE351<br>LEU353<br>GLN383                                                             |
| FICZ      |    | -9.38          | HIS291<br>GLN383 |                       | HIS291<br>PHE295<br>GLY321<br>PHE324<br>CYS333<br>SER336<br>HIS337<br>MET348<br>PHE351<br>LEU353<br>GLN383                                         |
| BaP       |   | -9.22          |                  |                       | PHE287<br>HIS291<br>LEU306<br>TYR310<br>LEU315<br>GLY321<br>CYS333<br>PHE351<br>LEU353<br>VAL363<br>GLN383                                         |
| CH-223191 |  | -8.05          |                  |                       | PHE287<br>THR289<br>HIS291<br>PHE295<br>LEU308<br>TYR310<br>LEU315<br>TYR332<br>CYS333<br>SER336<br>HIS337<br>MET348<br>PHE351<br>LEU353<br>GLN383 |

| Chemicals   |                                                                                     | Binding Energy | H-Bond                            | Pi-Cation interaction | Close Contact                                                                                                                  |
|-------------|-------------------------------------------------------------------------------------|----------------|-----------------------------------|-----------------------|--------------------------------------------------------------------------------------------------------------------------------|
| Vemurafenib | 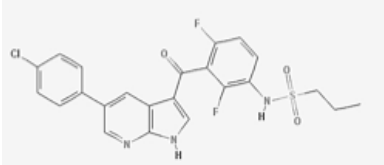   | -8.01          | ILE306 THR387<br>LEU386           |                       | PHE287<br>ILE306<br>VAL307<br>LEU308<br>THR355<br>LYS356<br>ASN357<br>ARG384<br>PRO385<br>LEU386<br>THR387<br>ASP388<br>GLU389 |
| Dabrafenib  |    | -8.07          | ILE306 THR387                     |                       | ILE306<br>VAL307<br>LEU308<br>THR355<br>LYS356<br>ASN357<br>ARG384<br>PRO385<br>THR387<br>ASP388<br>GLU389                     |
| PLX7904     |   | -6.79          | ILE306 THR387<br>LEU386           |                       | PHE287<br>ILE306<br>VAL307<br>GLY309<br>GLN383<br>ARG384<br>PRO385<br>LEU386<br>THR387<br>ASP388<br>GLU389                     |
| PLX8394     |  | -7.96          | GLN323<br>THR355<br>His326 ILE325 | ARG316                | TYR310<br>GLU314<br>ARG318<br>GLN323<br>PHE324<br>ILE325<br>HIS326<br>ALA327<br>MET330<br>LEU354<br>THR355<br>LYS356<br>TRP360 |
| Resveratrol |  | -6.39          | CYS300<br>GLY321                  |                       | PHE287<br>THR289<br>HIS291<br>PHE295<br>CYS300<br>LEU308<br>TYR310<br>LEU315<br>GLY321<br>ILE325<br>LEU353                     |

common AA inside the pocket

common AA outside the pocket

common AA between AhR ligand and BRAF1

**Supplementary Table 2 : siRNA, shRNA and CRISPR Cas9 sequences.**

| IDT DNA siRNA         |             |                                      |
|-----------------------|-------------|--------------------------------------|
| siCTR-siNC1           | Sens 5'- 3' | CGUUAUCGCGUAUACGCGUA                 |
| mOCA2 mm.Ri.OCA2.13.1 | Sens 5'- 3' | GCCCUACUAAUAAAGAUGCUGGAACCAUCUUUUUUA |
| hARNT hs.Ri.ARNT.13.1 | Sens 5'- 3' | UACGCAUGGCAGUUUCACACAUGAA            |
| hARNT hs.Ri.ARNT.13.3 | Sens 5'- 3' | GACCUGAAAUUGUAUAGUGUUGATT            |

| Origene shRNA human AhR |             |                                |
|-------------------------|-------------|--------------------------------|
| shAhR #1                | Sens 5'- 3' | CACTAGTGGAAAAGACTCTGCTACCATCCA |
| shAhR #2                | Sens 5'- 3' | CAGCAACAGTCCTTGGCTCTGAACTCAAG  |
| shAhR #3                | Sens 5'- 3' | GTAATCAGCCTGTATTACCACAACATCCA  |

| Sigma shRNA murin AhR |             |                                                                |
|-----------------------|-------------|----------------------------------------------------------------|
| shCTR                 | Sens 5'- 3' | SHC002V                                                        |
| shAhR TCRN0000055410  | Sens 5'- 3' | CCGGGCTGGATAATTCATCTGGTTTCTCGAGAAACCAGATGAATTATCCAGCTTTTTG     |
| shAhR TCRN0000218025  | Sens 5'- 3' | GTACCGGGTCAAGCCTGTTAGCTATATTCTCGAGAATATAGCTAACAGGCTTGACTTTTTTG |

| CRISPR CAS9 sg sequence |             |                      |
|-------------------------|-------------|----------------------|
| hAhR #1                 | Sens 5'- 3' | GGATAACTGTAGAGCAGCAA |
| hAhR #2                 | Sens 5'- 3' | CCCCTACTGAAAGAAACGGA |

**Supplementary Table 3 : Primer sequences for RT-qPCR and for ChIP-qPCR.**

| RT-qPCR primers        |               |         |                                |                           |                         |                           |
|------------------------|---------------|---------|--------------------------------|---------------------------|-------------------------|---------------------------|
|                        | Genes         |         |                                |                           |                         |                           |
| Pigmentation signature | TYR           | Forward | cctctagtcctcacaggtctgca        | Reverse                   | gtgggatacgagccaattcga   |                           |
|                        | MLANA         | Forward | gagaaaaactgtgaacctgtggt        | Reverse                   | aagggtgggtgactgttctg    |                           |
|                        | MITF          | Forward | atgctggaatgctagaatataatcactatc | Reverse                   | gggctgctgtatgtggtacatg  |                           |
|                        | SLC45A2       | Forward | tcactaccatgacctctc             | Reverse                   | cccagctctatagcacccaaaa  |                           |
|                        | TRPM1         | Forward | ggacatctttggtgcaacaagt         | Reverse                   | ccacaaagtacagcatgtcgat  |                           |
|                        | MLPH          | Forward | cacagttgtgacctctg              | Reverse                   | ggcctcctcctclacatcg     |                           |
|                        | SNCA          | Forward | gagtgccattcgacgac              | Reverse                   | ccctgtttggtttctcagc     |                           |
|                        | Rab27a        | Forward | gctgccaatgggacaaacata          | Reverse                   | caccgttccatctgcttcat    |                           |
|                        | GPR143        | Forward | cactgatgcccatgaaaa             | Reverse                   | tgctctggcatcagaacc      |                           |
|                        | TYRP1         | Forward | ccagaggggtctcatcatagtcaggag    | Reverse                   | atatccagggcccgagca      |                           |
|                        | MC1R          | Forward | gctcaaggaggtgctgacat           | Reverse                   | ctcacatcccagctgacg      |                           |
|                        | OCA2          | Forward | ggagttgaaactgaccagga           | Reverse                   | agttcccgagcctgaagt      |                           |
|                        | AhR signature | AhR     | Forward                        | accagcctcaggatgtgaac      | Reverse                 | tcattatgctgtacaagtcactgtt |
| CDK2                   |               | Forward | gggctcgaaatatttccaca           | Reverse                   | cagaatctccaggaacagg     |                           |
| AhRR                   |               | Forward | agagggcaccttctgcaaac           | Reverse                   | ctcagctctgctgtatctt     |                           |
| TIPARP                 |               | Forward | tctcaggctcccgtcag              | Reverse                   | tggttccattccaatgtg      |                           |
| INHBA                  |               | Forward | agctcagacagctctaccaca          | Reverse                   | tttctctcctctcagca       |                           |
| PMAIP1                 |               | Forward | uagcgauaaacacaucaa             | Reverse                   | cuauccagcaagcucuaa      |                           |
| THBS1                  |               | Forward | caatgccacagttcctgatg           | Reverse                   | tgagaccagccatcgtc       |                           |
| REEP2                  |               | Forward | acgctcacggatagtgctc            | Reverse                   | gctggagccctgggtga       |                           |
| CYP1B1                 |               | Forward | acgtaccggccactatcact           | Reverse                   | ctcagctctgcacatcagga    |                           |
| OSMR                   |               | Forward | tgagttttcatcactccattca         | Reverse                   | gatatgaatcagcatcgaggat  |                           |
| CYP1A1                 |               | Forward | acctccctgatccttgtga            | Reverse                   | gatctggagggtggctgt      |                           |
| Resistant genes        |               | BIRC3   | Forward                        | gatgaaatgcagagctcatcaatta | Reverse                 | catgattgcatctctgatgg      |
|                        |               | GCNT1   | Forward                        | cctgacagcatgtgaagtgc      | Reverse                 | ctgaaatgaagcagcagca       |
|                        | LPAR5         | Forward | aaagtgtggaagccagggta           | Reverse                   | cactgccacccctaaagaa     |                           |
|                        | EGFR          | Forward | ttctcccagtgctgaa               | Reverse                   | ggttcagaggctgattgtgat   |                           |
|                        | ZEB1          | Forward | ttagacacaagcgagaggatca         | Reverse                   | tgaaatcgaattgttctaccaca |                           |
|                        | NRP1          | Forward | aataaccacattcacaagaagattg      | Reverse                   | tcatcaatttaattctgggtct  |                           |
|                        | LPAR1         | Forward | ccatctcactctccatccctgtaa       | Reverse                   | actcgtgtgagaagcactgtgg  |                           |
|                        | ITGB3         | Forward | cgtaaatgtgaggaagaacg           | Reverse                   | gaaggtagacgtggcctctt    |                           |
|                        | AXL           | Forward | cgtaaccctcacctgtctc            | Reverse                   | tccatcgtctgacagca       |                           |
|                        | NGFR          | Forward | tcatccctgtctattgctcca          | Reverse                   | gttctgctgacagctgtc      |                           |
|                        | ITGA9         | Forward | ttgtgggtgggaatcctcat           | Reverse                   | acctcggcgaagaagc        |                           |
|                        | SNX13         | Forward | tgtaaaagatcctagttcagaggat      | Reverse                   | gcttctgtaggagaccatt     |                           |
|                        | PCDH7         | Forward | ctaccaccagccaacacatt           | Reverse                   | tgaaatcagccaacacag      |                           |
|                        | BCAR3         | Forward | agaaaggaggaagaggcaaga          | Reverse                   | tctggaaggctgcaaat       |                           |
|                        | BRI3          | Forward | accgagatcctgctgacg             | Reverse                   | ccccttggatgatgtt        |                           |
|                        | TEAD4         | Forward | gctccggacagggagagac            | Reverse                   | caaagctcctgccaacact     |                           |
|                        | WDR24         | Forward | aaggacatcgacgagcagac           | Reverse                   | gttgacacgttccagagg      |                           |
|                        | MAP3K11       | Forward | tgggatgcaactacctgcac           | Reverse                   | tgctcctatgctcactctc     |                           |
|                        | HMGXB3        | Forward | aggggacaagtacctccagtc          | Reverse                   | ggggtaagcaggtcaactcc    |                           |
|                        | rRNA 18S      | Forward | ccggggaggtagtgacga             | Reverse                   | aaggattaaagtgactattcca  |                           |
|                        | MARK3         | Forward | aaaagtaaatggcaagacatattc       | Reverse                   | ttttgcaatttttatgcaacc   |                           |

| ChIP-qPCR primers |         |         |                      |         |                      |
|-------------------|---------|---------|----------------------|---------|----------------------|
|                   | Genes   |         |                      |         |                      |
|                   | pTIPARP | Forward | tggggagtaggcaataaaca | Reverse | ttccgagaagaccagacac  |
|                   | pNRP1   | Forward | aactggcgactgggaatc   | Reverse | cgactcgcactctctt     |
|                   | pGCNT1  | Forward | ctggagtcagtggtgtgat  | Reverse | ggagggatcactgaacctg  |
|                   | pAXL    | Forward | cctgagctgagaggggag   | Reverse | gtccctctgggctctgtgt  |
|                   | pTEAD4  | Forward | aagcgtctccaacaaggag  | Reverse | acacatgccaggagctct   |
|                   | pEGFR   | Forward | acctggcacagatttg     | Reverse | tgaggagtaattccgagagg |
|                   | pZEB1   | Forward | ggcgtggactgatggta    | Reverse | attctcctgtaccctgtgc  |
|                   | pOCA2   | Forward | gcaaggctctctgttttcca | Reverse | ccccctcttgagaatgtgc  |

Supplementary Table 4 : Statistic data sources.

Figure 1

| Figure 1a                                                               |         |        |    |          |
|-------------------------------------------------------------------------|---------|--------|----|----------|
| %                                                                       | Mean    | SD     | n  | P value  |
| CTR                                                                     | 100     | 21,821 | 3  |          |
| FICZ 0,1nM                                                              | 113,417 | 2,731  | 3  | 0,350237 |
| FICZ 1nM                                                                | 58,174  | 10,643 | 3  | 0,040578 |
| FICZ 10nM                                                               | 9,124   | 6,480  | 3  | 0,002295 |
| FICZ 100nM                                                              | -1,157  | 5,525  | 3  | 0,001469 |
| Vem 0,1mM                                                               | 93,537  | 6,750  | 3  | 0,649736 |
| Vem 1µM                                                                 | 54,926  | 2,209  | 3  | 0,023593 |
| Vem 10µM                                                                | 11,847  | 6,165  | 3  | 0,002534 |
| Values represent % of remaining [3H]TCDD radioactivity to CTR condition |         |        |    |          |
| Figure 1c                                                               |         |        |    |          |
|                                                                         | Median  | SD     | n  | P value  |
| CTR (DMSO)                                                              | 5       | 3,158  | 28 |          |
| TCDD 10nM                                                               | 23,5    | 8,656  | 18 | <0,0001  |
| Vem 1µM                                                                 | 4       | 2,376  | 21 | 0,0491   |
| non-parametric two-tailed Mann Whitney test CTR vs TCDD or Vem          |         |        |    |          |
| Figure 1d                                                               |         |        |    |          |
|                                                                         | Mean    | SD     | n  | P value  |
| CTR (DMSO)                                                              | 1       | 0      | 3  |          |
| TCDD 10nM                                                               | 3,125   | 0,38   | 3  | 0,000634 |
| Vem 1µM                                                                 | 0,458   | 0,024  | 3  | <0,0001  |
| Values represent Luciferase enrichment relative to CTR condition        |         |        |    |          |
| Figure 1e                                                               |         |        |    |          |
|                                                                         | Mean    | SD     | n  | P value  |
| CTR (DMSO)                                                              | 1       | 0      | 6  |          |
| TCDD 10nM                                                               | 20,708  | 3,847  | 6  | <0,0001  |
| Vem 1µM                                                                 | 0,693   | 0,333  | 6  | 0,047639 |
| Relative quantitative RNA was normalized to 18S rRNA                    |         |        |    |          |
| Values represent fold change relative to CTR condition                  |         |        |    |          |
| Figure 1f                                                               |         |        |    |          |
|                                                                         | Mean    | SD     | n  | P value  |
| CTR (DMSO)                                                              | 1       | 0      | 3  |          |
| TCDD 10nM                                                               | 100     | 12     | 3  | 0,000139 |
| Vem 1µM                                                                 | -2,2    | 2,5    | 3  | 0,090913 |
| Values % of EROD activity to TCDD induced MCF7 condition                |         |        |    |          |

**Figure 2**

| Figure 2h  |           |                                        |                                       |                                    |
|------------|-----------|----------------------------------------|---------------------------------------|------------------------------------|
| Cell lines | IC50      | log2 fold change ( $\alpha$ signature) | log2 fold change ( $\beta$ signature) | fold change (resistance signature) |
| 501 S      | 4,679E-08 | 1                                      | 1                                     | 1                                  |
| MM001      | 9,143E-08 | 1,059203                               | 0,9751523                             | 2,219208                           |
| MM074 S    | 0,0000001 | 1,712855                               | 1,252197                              | 2,377848                           |
| Mel624     | 4,679E-07 | 1,560535                               | 1,07601                               | 1,67031                            |
| 501 R      | 5,579E-07 | 1,611878                               | 0,669492                              | 3,568108                           |
| Skmel28 S  | 5,697E-07 | 1,986582                               | 0,4181132                             | 2,678657                           |
| MM074 R    | 0,000001  | 2,625797                               | 0,8070144                             | 3,875775                           |
| Skmel28 R  | 1,75E-06  | 2,227963                               | 0,0017973                             | 5,052008                           |
| Mel165     | 1,795E-06 | 2,985939                               | 0,00043556                            | 6,353109                           |

n=1

**Figure 5**

| Figure 5c               |                   |                    |   |
|-------------------------|-------------------|--------------------|---|
| fold enrichment vs DMSO | Mean TCDD 10nM 7J | Mean TCDD 10nM 14J | n |
| AhR                     | 0,8608            | 2,9031             | 2 |
| GCNT1                   | 0,7411            | 1,3902             | 2 |
| BIRC3                   | 0,9165            | 2,9503             | 2 |
| THBS1                   | 2,4238            | 6,9312             | 2 |
| AXL                     | 7,9785            | 7,5228             | 2 |
| ZEB1                    | 0,8286            | 12,2491            | 2 |
| LPAR1                   | 1,1260            | 4,0799             | 2 |
| TIPARP                  | 1,4299            | 0,3483             | 2 |
| NRP1                    | 0,7759            | 1,0277             | 2 |
| CYP1A1                  | 5,8179            | 5,4463             | 2 |
| NGFR                    | 0,4516            | 5,1084             | 2 |
| EGFR                    | 2,3586            | 2,0499             | 2 |

| Figure 5e 501Mel S |        |               |        |               |   |
|--------------------|--------|---------------|--------|---------------|---|
| Gene               | CR-CTR |               | CR-AhR |               | n |
|                    | CTR    | Vem 1 $\mu$ M | CTR    | Vem 1 $\mu$ M |   |
| AhR                | 1      | 0,828         | 0,311  | 0,529         | 2 |
| BCAR3              | 1      | 1,490         | 4,073  | 2,973         | 2 |
| AXL                | 1      | 0,276         | 1,120  | 0,351         | 2 |
| EGFR               | 1      | 0,797         | 0,062  | 0,053         | 2 |
| NRP1               | 1      | 0,783         | 0,949  | 0,464         | 2 |
| TEAD4              | 1      | 0,552         | 0,649  | 0,357         | 2 |
| LPAR1              | 1      | 0,554         | 0,005  | 0,015         | 2 |
| GCNT1              | 1      | 0,272         | 0,292  | 0,057         | 2 |
| NGFR               | 1      | 0,949         | 1,105  | 0,513         | 2 |
| WDR24              | 1      | 1,185         | 0,627  | 0,745         | 2 |
| RPS16              | 1      | 0,840         | 0,004  | 0,004         | 2 |
| SNX13              | 1      | 1,493         | 1,136  | 1,207         | 2 |
| BIRC3              | 1      | 1,138         | 5,512  | 3,103         | 2 |
| ATP10A             | 1      | 1,699         | 0,002  | 0,001         | 2 |
| PHB                | 1      | 1,276         | 0,348  | 0,407         | 2 |
| OCA2               | 1      | 2,727         | 0,057  | 0,173         | 2 |
| Mitf               | 1      | 2,054         | 0,357  | 0,806         | 2 |
| TYRP1              | 1      | 3,612         | 0,173  | 0,192         | 2 |
| SLC45A2            | 1      | 1,788         | 0,336  | 0,111         | 2 |
| GPR143             | 1      | 1,719         | 0,036  | 0,060         | 2 |
| Rab27a             | 1      | 2,226         | 1,428  | 2,313         | 2 |
| MLPH               | 1      | 1,959         | 1,017  | 1,416         | 2 |
| CYP1A1             | 1      | 0,192         | 0,796  | 0,337         | 2 |
| AhRR               | 1      | 1,713         | 3,036  | 5,569         | 2 |
| PMAIP1             | 1      | 0,324         | 0,294  | 0,172         | 2 |

Relative quantitative RNA was normalized to 18S rRNA  
 Values represent fold change relative to CTR condition

| Figure 5f |          |        |           |        |   |
|-----------|----------|--------|-----------|--------|---|
| Gene      | 501MeI R |        | SKMeI28 R |        | n |
|           | siAhR    | siARNT | siAhR     | siARNT |   |
| AhR       | 0,175    | 0,739  | 0,191     | 0,413  | 2 |
| ARNT      | 0,577    | 0,297  | 0,630     | 0,369  | 2 |
| ZEB1      | 0,502    | 0,125  | 0,673     | 0,713  | 2 |
| GCNT1     | 0,454    | 0,556  | 0,929     | 0,994  | 2 |
| BRI3      | 1,086    | 1,224  | 0,739     | 0,790  | 2 |
| BIRC3     | 0,178    | 0,539  | 0,656     | 0,469  | 2 |
| PHB       | 0,854    | 0,654  | 0,941     | 0,744  | 2 |
| SNX13     | 0,568    | 0,553  | 0,727     | 0,663  | 2 |
| ATP10A    | 0,501    | 0,637  | 1,981     | 5,141  | 2 |
| PCDH7     | 0,998    | 1,309  | 1,263     | 1,333  | 2 |
| TEAD4     | 6,589    | 9,673  | 1,030     | 1,297  | 2 |
| LPAR1     | 0,550    | 0,544  | 1,831     | 1,473  | 2 |
| HMGXB3    | 0,532    | 0,590  | 0,675     | 0,787  | 2 |
| EGFR      |          |        | 0,660     | 0,796  | 2 |
| NGFR      | 1,361    | 0,652  | 2,806     | 2,535  | 2 |
| AXL       | 0,438    | 1,045  | 0,605     | 0,656  | 2 |
| NRP1      | 5,065    | 1,157  | 1,418     | 1,261  | 2 |
| AhRR      | 0,867    | 0,985  | 0,781     | 1,325  | 2 |

Relative quantitative RNA was normalized to 18S rRNA  
Values represent fold change relative to siCTR condition (siINT1)

Figure 6

| Figure 6a               |       |       |   |                       |        |       |   |                       |
|-------------------------|-------|-------|---|-----------------------|--------|-------|---|-----------------------|
| fold enrichment vs DMSO | OCA2  | SD    | n | P value vs CTR (DMSO) | CYP1A1 | SD    | n | P value vs CTR (DMSO) |
| Vem                     | 4,194 | 0,356 | 3 | 9,961E-05             | 0,693  | 0,333 | 3 | 0,18579               |
| PLX7904                 | 4,079 | 0,842 | 3 | 3,174E-03             | 0,387  | 0,087 | 3 | 0,00026               |
| PLX8394                 | 4,483 | 0,145 | 3 | 1,990E-06             | 0,685  | 0,377 | 3 | 0,22180               |
| Dab                     | 3,909 | 0,391 | 3 | 2,080E-04             | 0,771  | 0,419 | 3 | 0,39668               |
| TCDD                    | 1,633 | 0,081 | 3 | 1,696E-04             | 20,708 | 3,847 | 3 | 0,00089               |
| BaP                     | 1,579 | 0,109 | 3 | 7,636E-04             | 13,392 | 5,022 | 3 | 0,01291               |
| Lkyn                    | 0,861 | 0,165 | 3 | 2,178E-01             | 0,982  | 0,251 | 3 | 0,90657               |
| FICZ                    | 1,846 | 0,046 | 3 | 5,891E-06             | 5,276  | 0,507 | 3 | 0,00013               |
| CH-223191               | 0,226 | 0,054 | 3 | 1,550E-05             | 0,402  | 0,291 | 3 | 0,02362               |
| RSV                     | 0,960 | 0,057 | 3 | 2,879E-01             | 0,910  | 0,128 | 3 | 0,28786               |

Relative quantitative RNA was normalized to 18S rRNA

| Figure 6c           |       |       |   |                |                 |
|---------------------|-------|-------|---|----------------|-----------------|
| CYP1A1              | Mean  | SD    | n | P value vs CTR | P value vs TCDD |
| CTR (DMSO)          | 0,873 | 0,180 | 3 |                |                 |
| TCDD 10nM           | 9,139 | 1,077 | 3 | 0,0001951      |                 |
| RSV 5mM             | 1,763 | 0,008 | 3 | 0,0010143      |                 |
| RSV 5mM + TCDD 10nM | 1,209 | 0,256 | 3 | 0,1365030      | 0,0002422       |

Relative quantitative RNA was normalized to 18S rRNA  
Values represent fold change relative to CTR condition

| Figure 6f         |       |       |   |                |                 |
|-------------------|-------|-------|---|----------------|-----------------|
| OCA2              | Mean  | SD    | n | P value vs CTR | P value vs TCDD |
| CTR (DMSO)        | 0,960 | 0,057 | 3 |                |                 |
| Vem 1µM           | 4,194 | 0,356 | 3 | 9,967048E-05   |                 |
| RSV 5mM           | 0,654 | 0,207 | 3 | 6,898830E-02   |                 |
| RSV 5mM + Vem 1mM | 1,040 | 0,061 | 3 | 1,717660E-01   | 1,109420E-04    |

Relative quantitative RNA was normalized to 18S rRNA  
Values represent fold change relative to CTR condition





| Figure 6l                                        |          |         |          |          |          |          |          |
|--------------------------------------------------|----------|---------|----------|----------|----------|----------|----------|
| Dabrafenib (30mg/Kg daily) + RSV (40mg/kg daily) |          |         |          |          |          |          |          |
| Days after treatment/ tumor volume (mm3)         | #1       | #2      | #3       | #4       | #5       | #6       | #7       |
| 14                                               | 427,9034 | 462,071 | 307,4376 | 294,9526 | 384,9775 | 225,8256 | 352,0565 |

  

| Figure 6m                                        |    |    |    |    |    |    |    |
|--------------------------------------------------|----|----|----|----|----|----|----|
| Dabrafenib (30mg/Kg daily) + RSV (40mg/kg daily) |    |    |    |    |    |    |    |
| Max tumor volume/ days to reach                  | #1 | #2 | #3 | #4 | #5 | #6 | #7 |
| 800 mm3                                          | 20 | 20 | 24 | 22 | 26 | 30 |    |

## Supplementary Figure 1

| Supplementary Figure 1a |         |        |   |          |
|-------------------------|---------|--------|---|----------|
| %                       | Mean    | SD     | n | P value  |
| CTR                     | 100     | 21,821 | 3 | 1        |
| FICZ 10nM               | 9,124   | 6,480  | 3 | 0,002295 |
| Dab 1 $\mu$ M           | 82,590  | 8,665  | 3 | 0,268346 |
| Dab 10 $\mu$ M          | 54,800  | 14,480 | 3 | 0,040358 |
| Dab 100 $\mu$ M         | 8,257   | 6,845  | 3 | 0,002254 |
| PLX7904 1 $\mu$ M       | 109,550 | 34,563 | 3 | 0,706421 |
| PLX7904 10 $\mu$ M      | 63,662  | 10,763 | 3 | 0,060888 |
| PLX7904 100 $\mu$ M     | 34,577  | 23,865 | 3 | 0,024801 |
| PLX8394 1 $\mu$ M       | 80,469  | 12,622 | 3 | 0,250708 |
| PLX8394 10 $\mu$ M      | 88,520  | 24,097 | 3 | 0,573809 |
| PLX8394 100 $\mu$ M     | 20,291  | 13,543 | 3 | 0,005785 |

Values represent % of remaining [3H]TCDD radioactivity to CTR condition

| Supplementary Figure 1d |       |       |   |          |
|-------------------------|-------|-------|---|----------|
|                         | Mean  | SD    | n | P value  |
| CTR (DMSO)              | 1     |       | 3 |          |
| Dab 100nM               | 0,705 | 0,141 | 3 | 0,022082 |
| PLX7904 1 $\mu$ M       | 0,232 | 0,022 | 3 | <0,0001  |
| PLX8394 1 $\mu$ M       | 0,192 | 0,017 | 3 | <0,0001  |

Values represent Luciferase enrichment relative to CTR condition

| Supplementary Figure 1e |       |       |   |          |
|-------------------------|-------|-------|---|----------|
|                         | Mean  | SD    | n | P value  |
| CTR (DMSO)              | 1     |       | 6 |          |
| Dab 100nM               | 0,771 | 0,419 | 6 | 0,209559 |
| PLX7904 1 $\mu$ M       | 0,387 | 0,087 | 6 | <0,0001  |
| PLX8394 1 $\mu$ M       | 0,685 | 0,377 | 6 | <0,0001  |

Relative quantitative RNA was normalized to 18S rRNA

Values represent fold change relative to CTR condition

| Supplementary Figure 1f |      |     |   |          |
|-------------------------|------|-----|---|----------|
|                         | Mean | SD  | n | P value  |
| CTR (DMSO)              | 1    | 0   | 3 |          |
| Dab 100nM               | 0,3  | 0,5 | 3 | 0,158302 |
| PLX7904 1 $\mu$ M       | 2,1  | 2,6 | 3 | 0,504314 |
| PLX8394 1 $\mu$ M       | -1,8 | 2,8 | 3 | 0,158302 |

Values % of EROD activity to TCDD induced MCF7 condition

## Supplementary Figure 2

| Supplementary Figure 2b |       |       |   |          |
|-------------------------|-------|-------|---|----------|
|                         | Mean  | SD    | n | P value  |
| 0                       | 1     | 0     | 3 |          |
| 6                       | 1,226 | 0,060 | 3 | 0,053706 |
| 12                      | 2,666 | 0,356 | 3 | 0,001621 |
| 24                      | 3,249 | 0,149 | 3 | <0,0001  |
| 48                      | 2,197 | 0,236 | 3 | 0,00143  |
| 0                       | 1     | 0     | 3 |          |
| 6                       | 1,416 | 0,097 | 3 | 0,167731 |
| 12                      | 3,430 | 0,060 | 3 | <0,0001  |
| 24                      | 4,545 | 0,074 | 3 | <0,0001  |
| 48                      | 6,275 | 0,476 | 3 | <0,0001  |

Relative quantitative RNA was normalized to 18S rRNA  
Values represent fold change relative to CTR condition

| Supplementary Figure 2c |       |        |    |          |
|-------------------------|-------|--------|----|----------|
| %                       | Mean  | SD     | n* | P value  |
| CTR DMSO                | 100   | 29,772 | 2  |          |
| shAhR-1 DMSO            | 44,78 | 7,09   | 3  | 0,04457  |
| shAhR-2 DMSO            | 17,18 | 0,84   | 4  | 0,003032 |
| CTR Vem 1µM             | 100   | 6,71   | 2  |          |
| shAhR-1 Vem 1µM         | 69,69 | 13,05  | 3  | 0,104152 |
| shAhR-2 Vem 1µM         | 40,69 | 7,76   | 4  | 0,010056 |
| CTR TCDD 10nM           | 100   | 30,06  | 2  |          |
| shAhR-1 TCDD 10nM       | 52,82 | 7,76   | 3  | 0,067992 |
| shAhR-2 TCDD 10nM       | 39,47 | 5,73   | 4  | 0,011546 |

n\* number of cellular clones by shRNA  
Relative quantitative RNA was normalized to 18S rRNA  
Values represent % of enrichment to CTR condition

| Supplementary Figure 2d |      |       |   |         |
|-------------------------|------|-------|---|---------|
|                         | Mean | SD    | n | P value |
| IgG                     | 1    | 0     | 3 |         |
| Ac anti-AhR             | 2,01 | 0,059 | 3 | 0,0011  |

Values represent relative occupancy onto OCA2 promoter to CTR condition

| Supplementary Figure 2e      |       |       |   |          |
|------------------------------|-------|-------|---|----------|
|                              | Mean  | SD    | n | P value  |
| CTR                          | 1     | 0     | 3 |          |
| Vem 1µM                      | 2,89  | 0,17  | 3 | <0,0001  |
| TCDD 10nM                    | 1,171 | 0,19  | 3 | 0,212    |
| CH-223191 10µM               | 0,833 | 0,14  | 3 |          |
| CH-223191 10µM + Vem 1µM     | 0,724 | 0,141 | 3 | 0,254    |
| CH-223191 10µM + TCDD 10nM   | 0,68  | 0,061 | 3 | 0,013    |
| Dab 100nM                    | 3,032 | 0,263 | 3 | 0,000181 |
| PLX7904 1µM                  | 4,422 | 0,020 | 3 | <0,0001  |
| PLX8394 1µM                  | 6,323 | 0,874 | 3 | 0,000456 |
| CH-223191 10µM + Dab 100nM   | 0,623 | 0,017 | 3 | <0,0001  |
| CH-223191 10µM + PLX7904 1µM | 0,804 | 0,159 | 3 | 0,769766 |
| CH-223191 10µM + PLX8394 1µM | 0,995 | 0,068 | 3 | 0,015179 |

Values represent Luciferase enrichment relative to CTR condition

| Supplementary Figure 2f |       |       |   |          |
|-------------------------|-------|-------|---|----------|
|                         | Mean  | SD    | n | P value  |
| CTR                     | 0,477 | 0,087 | 3 |          |
| Vem 1µM                 | 0,339 | 0,039 | 3 | 0,066821 |
| TCDD 10nM               | 0,69  | 0,191 | 3 | 0,156043 |

Values represent Luciferase enrichment relative to CTR condition

| Supplementary Figure 2g |       |       |   |          |        |
|-------------------------|-------|-------|---|----------|--------|
|                         | Mean  | SD    | n | P value  |        |
| CTR DMSO                | 0,961 | 0,055 | 3 |          | OCA2   |
| CTR Vem 1µM             | 3,626 | 0,166 | 3 | <0,0001  |        |
| siARNT DMSO             | 0,705 | 0,020 | 3 | 0,001555 |        |
| siARNT Vem 1µM          | 3,515 | 0,358 | 3 | 0,000258 |        |
| CTR TCDD 10nM           | 1     | 0,073 | 3 | 0,181298 |        |
| siARNT TCDD 10nM        | 0,488 | 0,088 | 3 | 0,001376 |        |
| CTR DMSO                | 0,901 | 0,140 | 3 |          | CYP1A1 |
| CTR Vem 1µM             | 0,237 | 0,010 | 3 | 0,001197 |        |
| siARNT DMSO             | 0,553 | 0,092 | 3 | 0,022754 |        |
| siARNT Vem 1µM          | 0,238 | 0,016 | 3 | 0,001219 |        |
| CTR TCDD 10nM           | 20,68 | 2,518 | 3 | 0,00017  |        |
| siARNT TCDD 10nM        | 3,19  | 1,433 | 3 | 0,051182 |        |

Relative quantitative RNA was normalized to 18S rRNA

Values represent fold change relative to CTR condition

### Supplementary Figure 4

| Supplementary Figure 4 OCA2 expression |                                   |       |       |         |          |
|----------------------------------------|-----------------------------------|-------|-------|---------|----------|
|                                        |                                   | Mean  | SD    | n       | P value  |
| Fig 4a                                 | CTR (DMSO)                        | 1     | 0     | 6       |          |
|                                        | Vem 1µM                           | 4,194 | 0,356 | 6       | <0,0001  |
|                                        | PLX7904 1µM                       | 4,079 | 0,842 | 6       | <0,0001  |
|                                        | PLX8394 1µM                       | 4,483 | 0,145 | 6       | <0,0001  |
|                                        | Dab 100nM                         | 3,909 | 0,391 | 6       | <0,0001  |
|                                        | TCDD 10nM                         | 1,633 | 0,081 | 6       | <0,0001  |
| Fig 4b                                 | <b>Tram 1µM (co-treatment)</b>    |       |       |         |          |
|                                        | CTR (DMSO)                        | 3,882 | 0,078 | 3       | <0,0001  |
|                                        | Vem 1µM                           | 3,470 | 0,052 | 3       | <0,0001  |
|                                        | PLX7904 1µM                       | 4,009 | 0,123 | 3       | <0,0001  |
|                                        | PLX8394 1µM                       | 4,128 | 0,569 | 3       | <0,0001  |
|                                        | Dab 100nM                         | 4,028 | 0,350 | 3       | 0,00012  |
| Fig 4c                                 | <b>Cob 1µM (co-treatment)</b>     |       |       |         |          |
|                                        | CTR (DMSO)                        | 4,025 | 0,113 | 3       | <0,0001  |
|                                        | Vem 1µM                           | 3,862 | 0,060 | 3       | <0,0001  |
|                                        | PLX7904 1µM                       | 3,658 | 0,190 | 3       | <0,0001  |
|                                        | PLX8394 1µM                       | 3,251 | 0,271 | 3       | <0,0001  |
|                                        | Dab 100nM                         | 3,402 | 0,036 | 3       | <0,0001  |
| Fig 4d                                 | <b>CH-223191 10µM (2h before)</b> |       |       |         |          |
|                                        | CTR (DMSO)                        | 0,226 | 0,054 | 3       | <0,0001  |
|                                        | Vem 1µM                           | 0,322 | 0,008 | 3       | <0,0001  |
|                                        | PLX7904 1µM                       | 0,305 | 0,053 | 3       | <0,0001  |
|                                        | PLX8394 1µM                       | 0,765 | 0,103 | 3       | <0,0001  |
|                                        | Dab 100nM                         | 0,381 | 0,052 | 3       | <0,0001  |
| TCDD 10nM                              | 0,194                             | 0,023 | 3     | <0,0001 |          |
| Fig 4e                                 | <b>TCDD 10nM (2h before)</b>      |       |       |         |          |
|                                        | CTR (DMSO)                        | 1     | 0     | 3       |          |
|                                        | Vem 1µM                           | 1,317 | 0,243 | 3       | 0,010665 |
|                                        | PLX7904 1µM                       | 0,965 | 0,015 | 3       | <0,0001  |
|                                        | PLX8394 1µM                       | 0,849 | 0,119 | 3       | 0,012332 |
|                                        | Dab 100nM                         | 1,102 | 0,171 | 3       | 0,160549 |
| TCDD 10nM                              | 1,633                             | 0,081 | 6     | <0,0001 |          |

| Supplementary Figure 4 CYP1A1 expression |                                   |        |       |   |          |
|------------------------------------------|-----------------------------------|--------|-------|---|----------|
|                                          |                                   | Mean   | SD    | n | P value  |
| Fig 4a                                   | DMSO                              | 1      | 0     | 6 |          |
|                                          | Vem 1µM                           | 0,693  | 0,333 | 6 | 0,047639 |
|                                          | PLX7904 1µM                       | 0,387  | 0,087 | 6 | <0,0001  |
|                                          | PLX8394 1µM                       | 0,685  | 0,377 | 6 | 0,068138 |
|                                          | Dab 100nM                         | 0,771  | 0,419 | 6 | 0,209559 |
|                                          | TCDD 10nM                         | 20,708 | 3,847 | 6 | <0,0001  |
| Fig 4a                                   | <b>Tram 1µM (co-treatment)</b>    | Mean   | SD    | n | P value  |
|                                          | DMSO                              | 0,572  | 0,033 | 3 | <0,0001  |
|                                          | Vem 1µM                           | 0,418  | 0,092 | 3 | 0,000390 |
|                                          | PLX7904 1µM                       | 1,802  | 0,217 | 3 | 0,003044 |
|                                          | PLX8394 1µM                       | 1,636  | 0,051 | 3 | <0,0001  |
|                                          | Dab 100nM                         | 1,922  | 0,059 | 3 | <0,0001  |
| Fig 4a                                   | <b>Cob 1µM (co-treatment)</b>     | Mean   | SD    | n | P value  |
|                                          | DMSO                              | 0,547  | 0,000 | 3 | <0,0001  |
|                                          | Vem 1mM                           | 0,688  | 0,203 | 3 | 0,056414 |
|                                          | PLX7904 1mM                       | 0,605  | 0,133 | 3 | 0,006688 |
|                                          | PLX8394 1mM                       | 0,614  | 0,025 | 3 | <0,0001  |
|                                          | Dab 100nM                         | 0,659  | 0,036 | 3 | <0,0001  |
| Fig 4a                                   | <b>CH-223191 10µM (2h before)</b> | Mean   | SD    | n | P value  |
|                                          | DMSO                              | 0,402  | 0,291 | 3 | <0,0001  |
|                                          | Vem 1µM                           | 0,216  | 0,128 | 3 | <0,0001  |
|                                          | PLX7904 1µM                       | 0,452  | 0,165 | 3 | <0,0001  |
|                                          | PLX8394 1µM                       | 0,415  | 0,003 | 3 | <0,0001  |
|                                          | Dab 100nM                         | 0,552  | 0,054 | 3 | <0,0001  |
|                                          | TCDD 10nM                         | 0,556  | 0,040 | 3 | <0,0001  |
| Fig 4a                                   | <b>TCDD 10nM (2h before)</b>      | Mean   | SD    | n | P value  |
|                                          | DMSO                              | 1      | 0     | 3 |          |
|                                          | Vem 1mM                           | 0,917  | 0,482 | 3 | 0,663347 |
|                                          | PLX7904 1mM                       | 1,740  | 0,527 | 3 | 0,007485 |
|                                          | PLX8394 1mM                       | 0,475  | 0,156 | 3 | <0,0001  |
|                                          | Dab 100nM                         | 0,864  | 0,003 | 3 | <0,0001  |
|                                          | TCDD 10nM                         | 20,708 | 3,847 | 6 | <0,0001  |

| Supplementary Figure 4f Competition assay using XRE luc after activation by TCDD (5nM) |             |          |          |          |           |          |          |
|----------------------------------------------------------------------------------------|-------------|----------|----------|----------|-----------|----------|----------|
| % XRE Luc activity compared to control (TCDD 5nM alone)                                |             |          |          |          |           |          |          |
| Antagonist concentration (M)                                                           | Vemurafenib |          |          |          | CH-223191 |          |          |
| 0,00E+00                                                                               | 87,4451     | 100      | 100,0296 | 100      | 100       | 85,99702 | 93,45161 |
| 5,00E-08                                                                               | 94,48193    | 72,20885 | 75,83105 | 82,40413 | 71,51735  | 70,93938 | 77,71037 |
| 1,00E-07                                                                               | 61,27043    | 96,75644 | 97,21919 | 65,9942  | 72,15801  | 76,21183 | 61,91182 |
| 5,00E-07                                                                               | 54,39727    | 67,59219 | 71,03971 | 55,21734 | 49,78279  | 49,9878  | 54,46649 |
| 1,00E-06                                                                               | 32,22122    | 62,25197 | 58,39666 | 40,73503 | 37,57643  | 40,193   | 35,33511 |
| 2,00E-06                                                                               | 23,34847    | 62,62482 | 58,2317  | 38,994   | 38,0734   | 32,97725 | 39,82437 |
| 5,00E-06                                                                               | 13,19083    | 22,54103 | 27,29546 | 11,5572  | 16,66262  | 20,88602 | 18,82049 |
| 1,00E-05                                                                               |             | 17,6874  | 17,58166 |          | 13,87465  | 17,51776 | 19,2419  |
| 2,00E-05                                                                               | 4,012937    | 6,330139 | 8,372258 | 2,850804 | 13,69989  | 16,12879 | 18,89792 |

| Supplementary Figure 4f XRE binding assay (PLS unit) |                       |          |   |         |                             |          |   |         |
|------------------------------------------------------|-----------------------|----------|---|---------|-----------------------------|----------|---|---------|
|                                                      | Competition with DMSO |          |   |         | Competition with Vem (1 µM) |          |   |         |
|                                                      | Mean                  | SD       | n | P value | Mean                        | SD       | n | P value |
| CTR (DMSO)                                           | 6899,94               | 775,1472 | 3 |         | 5545,36                     | 1294,875 | 3 |         |
| TCDD                                                 | 24952,97              | 3224,679 | 3 | 0,19500 | 9952,193                    | 1755,89  | 3 | 0,00210 |

## Supplementary Figure 6

| Supplementary Figure 6b |      |                  |                    |        |
|-------------------------|------|------------------|--------------------|--------|
|                         | CTR  | Vem (1µM) for 6h | TCDD (10nM) for 1h | AhR KO |
| TIPARP                  | 1,04 | 1,18             | 9,63               | 0,53   |
| NRP1                    | 4,61 | 5,77             | 52,31              | 0,02   |
| GCNT1                   | 1,49 | 1,51             | 9,79               | 0,04   |
| TEAD4                   | 7,99 | 2,57             | 20,12              | 0,00   |
| EGFR                    | 0,09 | 0,09             | 0,09               | 0,09   |
| ZEB1                    | 0,12 | 0,12             | 0,12               | 0,12   |

Values represent relative occupancy of AhR (%) onto different genes promoter compared to Input (10%) (n=1)

## Supplementary Figure 8

| Supplementary Figure 8a |       |       |   |                |                  |
|-------------------------|-------|-------|---|----------------|------------------|
| OCA2                    | Mean  | SD    | n | P value vs CTR | P value vs BRAFi |
| CTR (DMSO)              | 0,910 | 0,128 | 3 |                |                  |
| Dab 100nM               | 3,909 | 0,391 | 3 | 0,000205       |                  |
| RSV 5mM                 | 0,654 | 0,207 | 3 | 0,068988       |                  |
| RSV 5mM + Dab 100nM     | 1,306 | 0,285 | 3 | 0,107584       | 0,000735         |
| CTR (DMSO)              | 0,910 | 0,128 | 3 |                |                  |
| PLX7904 1µM             | 5,626 | 0,028 | 3 | <0,0001        |                  |
| RSV 5mM                 | 0,654 | 0,207 | 3 | 0,068988       |                  |
| RSV 5mM + PLX7904 1mM   | 2,313 | 0,793 | 3 | 0,041923       | 0,001938         |
| CTR (DMSO)              | 0,910 | 0,128 | 3 |                |                  |
| PLX8394 1µM             | 5,397 | 0,972 | 3 | 0,001398       |                  |
| RSV 5mM                 | 0,654 | 0,207 | 3 | 0,068988       |                  |
| RSV 5mM + PLX8394 1mM   | 2,963 | 0,720 | 3 | 0,0085964      | 0,025281         |

Relative quantitative RNA was normalized to 18S rRNA

Values represent fold change relative to CTR condition

| Supplementary Figure 8b |       |       |   |                       |
|-------------------------|-------|-------|---|-----------------------|
|                         | Mean  | SD    | n |                       |
| 0h                      | 0,357 | 0,023 | 4 | CTR (DMSO)            |
| 24h                     | 0,739 | 0,034 | 4 |                       |
| 48h                     | 1,557 | 0,049 | 4 |                       |
| 72h                     | 1,886 | 0,066 | 4 |                       |
| 0h                      | 0,298 | 0,032 | 4 | Dab 100nM             |
| 24h                     | 0,536 | 0,034 | 4 |                       |
| 48h                     | 0,697 | 0,065 | 4 |                       |
| 72h                     | 0,478 | 0,051 | 4 |                       |
| 0h                      | 0,372 | 0,028 | 4 | RSV 5mM               |
| 24h                     | 0,624 | 0,027 | 4 |                       |
| 48h                     | 1,131 | 0,019 | 4 |                       |
| 72h                     | 1,228 | 0,059 | 4 |                       |
| 0h                      | 0,295 | 0,031 | 4 | RSV 5mM + Dab 100nM   |
| 24h                     | 0,560 | 0,077 | 4 |                       |
| 48h                     | 0,729 | 0,077 | 4 |                       |
| 72h                     | 0,573 | 0,102 | 4 |                       |
| 0h                      | 0,313 | 0,055 | 4 | PLX7904 1µM           |
| 24h                     | 0,555 | 0,093 | 4 |                       |
| 48h                     | 0,641 | 0,020 | 4 |                       |
| 72h                     | 0,501 | 0,086 | 4 |                       |
| 0h                      | 0,337 | 0,044 | 4 | RSV 5mM + PLX7904 1mM |
| 24h                     | 0,581 | 0,037 | 4 |                       |
| 48h                     | 0,704 | 0,036 | 4 |                       |
| 72h                     | 0,691 | 0,116 | 4 |                       |
| 0h                      | 0,344 | 0,010 | 4 | PLX8394 1µM           |
| 24h                     | 0,549 | 0,006 | 4 |                       |
| 48h                     | 0,657 | 0,049 | 4 |                       |
| 72h                     | 0,566 | 0,097 | 4 |                       |
| 0h                      | 0,362 | 0,013 | 4 | RSV 5mM + PLX8394 1mM |
| 24h                     | 0,552 | 0,044 | 4 |                       |
| 48h                     | 0,670 | 0,048 | 4 |                       |
| 72h                     | 0,541 | 0,109 | 4 |                       |

| Supplementary Figure 8c                  |                            |          |          |          |          |          |          |          |
|------------------------------------------|----------------------------|----------|----------|----------|----------|----------|----------|----------|
| Days after treatment/ tumor volume (mm3) | Dabrafenib (30mg/Kg daily) |          |          |          |          |          |          |          |
|                                          | #1                         | #2       | #3       | #4       | #5       | #6       | #7       | #8       |
| 0                                        | 228,5784                   | 145,9038 | 163,8505 | 453,9627 | 155,5811 | 192,3251 | 181,9278 | 212,3261 |
| 2                                        | 400,5609                   | 236,715  | 273,5388 | 785,0981 | 256,5916 | 253,1611 | 358,7481 | 145,4938 |
| 4                                        | 445,3407                   | 213,7754 | 309,2954 | 699,532  | 177,139  | 273,0444 | 362,9818 | 193,5539 |
| 6                                        | 446,8115                   | 161,346  | 443,423  | 463,8883 | 246,3018 | 383,0661 | 237,6396 | 177,0281 |
| 8                                        | 513,4908                   | 171,8426 | 284,6789 | 431,2435 | 181,2704 | 267,6297 | 435,4947 | 232,2182 |
| 10                                       | 586,1133                   | 278,1571 | 500,9821 | 579,2245 | 207,8737 | 210,371  | 490,1361 | 281,6341 |
| 12                                       | 563,4523                   | 376,8195 | 646,1647 | 673,1277 | 338,8754 | 404,3548 | 681,4609 | 258,4264 |
| 14                                       | 649,7568                   | 748,9422 | 1175,886 | 949,5294 | 482,5809 | 389,1881 | 888,3819 | 342,974  |
| 16                                       | 847,4342                   | 779,0064 |          | 1553,923 | 447,7659 | 629,5346 |          | 847,3161 |
| 18                                       | 761,9802                   | 1159,95  |          |          | 616,3477 | 504,2755 |          | 943,5343 |

| Supplementary Figure 8c                  |                                                  |          |          |          |          |          |          |
|------------------------------------------|--------------------------------------------------|----------|----------|----------|----------|----------|----------|
| Days after treatment/ tumor volume (mm3) | Dabrafenib (30mg/Kg daily) + RSV (40mg/kg daily) |          |          |          |          |          |          |
|                                          | #1                                               | #2       | #3       | #4       | #5       | #6       | #7       |
| 0                                        | 221,4501                                         | 194,1715 | 275,3976 | 224,8464 | 398,1097 | 244,3485 | 244,1665 |
| 2                                        | 257,4719                                         | 189,4749 | 168,3477 | 286,4874 | 250,3039 | 174,2905 | 275,6007 |
| 4                                        | 237,0102                                         | 232,694  | 177,4051 | 218,9116 | 248,9659 | 154,4211 | 240,943  |
| 6                                        | 188,7079                                         | 186,8194 | 198,6457 | 332,4404 | 215,6226 | 134,3872 | 226,298  |
| 8                                        | 321,1533                                         | 219,9162 | 297,2921 | 210,2907 | 221,5042 | 377,3848 | 253,0369 |
| 10                                       | 375,9003                                         | 388,4406 | 301,4202 | 433,4024 | 340,393  | 274,9919 | 243,5691 |
| 12                                       | 274,3714                                         | 399,4749 | 321,6159 | 557,6225 | 483,5854 | 289,065  | 345,9168 |
| 14                                       | 427,9034                                         | 462,071  | 307,4376 | 294,9526 | 384,9775 | 225,8256 | 352,0565 |
| 16                                       | 609,4879                                         | 597,6372 | 281,6883 | 565,3165 | 435,1711 | 359,6186 | 247,3423 |
| 18                                       | 545,4904                                         | 719,8815 | 544,3751 | 517,2294 | 471,3379 | 456,4025 | 380,7241 |
